# Supplementary material for: “That’s the whole thing about vaping, it’s custom tasty goodness”: a meta-ethnography of young adults’ perceptions and experiences of e-cigarette use
Source: Springer Nature journal article supplement (doi:10.1186/s13011-021-00416-4), 2021-11-12
Supplement: MOESM1 [file 19861848]

## Additional File 1: Table of Search Terms

| #  | Searches                                                                                                                                                                | Results |
|----|-------------------------------------------------------------------------------------------------------------------------------------------------------------------------|---------|
| 1  | (teen or teens or teenage*).tw.                                                                                                                                         | 23946   |
| 2  | adolescen*.tw.                                                                                                                                                          | 199905  |
| 3  | (youth or youths).tw.                                                                                                                                                   | 47651   |
| 4  | ((young adj (person* or people or adult*)) or early adult*).tw.                                                                                                         | 91043   |
| 5  | (student or students).tw.                                                                                                                                               | 198273  |
| 6  | adolescent/                                                                                                                                                             | 1851152 |
| 7  | or/1-6                                                                                                                                                                  | 2072789 |
| 8  | "Tobacco use"/                                                                                                                                                          | 811     |
| 9  | *Smoking/                                                                                                                                                               | 73289   |
| 10 | "Tobacco Use Disorder"/px [Psychology]                                                                                                                                  | 2640    |
| 11 | Tobacco products/                                                                                                                                                       | 2152    |
| 12 | Vaping/                                                                                                                                                                 | 39      |
| 13 | (smoke or smoking or smoker or smokers).tw.                                                                                                                             | 211434  |
| 14 | (vape or vaping or vaper or vapers).tw.                                                                                                                                 | 159     |
| 15 | (cigarette* or cigar or cigars or cigarillo*).tw.                                                                                                                       | 56939   |
| 16 | ("tobacco use" or "nicotine use").tw.                                                                                                                                   | 12226   |
| 17 | or/8-16                                                                                                                                                                 | 231279  |
| 18 | Qualitative research/ or Phenomenology/ or Focus groups/                                                                                                                | 52080   |
| 19 | (qualitative or ethnograph* or grounded theory).tw.                                                                                                                     | 152937  |
| 20 | ("semi-structured" or semistructured or unstructured or informal or "in-depth" or indepth or "face-to-face" or structured or guide) and (interview* or discussion*).tw. | 87378   |
| 21 | focus group*.tw.                                                                                                                                                        | 28344   |
| 22 | interviews as topic/                                                                                                                                                    | 53021   |
| 23 | ((audio-recorded or transcribed) and (interview* or survey* or questionnaire*).tw.                                                                                      | 8543    |
| 24 | (themes adj3 (identif* or explor*).tw.                                                                                                                                  | 8772    |
| 25 | or/18-24                                                                                                                                                                | 266415  |
| 26 | (identit* or reflecti* or meaning* or attitude* or perception* or perceiving*).tw.                                                                                      | 584308  |
| 27 | (self adj (concept or identit* or identif* or labe*).tw.                                                                                                                | 7955    |
| 28 | Attitude/                                                                                                                                                               | 44341   |
| 29 | Self concept/                                                                                                                                                           | 52545   |
| 30 | Social perception/                                                                                                                                                      | 20535   |
| 31 | social identification/                                                                                                                                                  | 8018    |
| 32 | or/26-31                                                                                                                                                                | 661280  |
| 33 | 7 and 17 and 25 and 32                                                                                                                                                  | 609     |
| 34 | limit 33 to (english language and yr="1998 -Current")                                                                                                                   | 555     |
