# Supplementary material for: “That’s the whole thing about vaping, it’s custom tasty goodness”: a meta-ethnography of young adults’ perceptions and experiences of e-cigarette use
Source: Springer Nature journal article supplement (doi:10.1186/s13011-021-00416-4), 2021-11-12
Supplement: MOESM2 [file 19861848]

Table of Characteristics of included studies

| Paper Number | Authors, Date of Publication, Country                           | Population Age, gender, cultural identification, recruited smoking/vaping status                              | Recruitment and Data Collection methods                                                                                                                                                                                                                                                                                                                                                                                                                                                                | Analysis               | Quality Rating |
|--------------|-----------------------------------------------------------------|---------------------------------------------------------------------------------------------------------------|--------------------------------------------------------------------------------------------------------------------------------------------------------------------------------------------------------------------------------------------------------------------------------------------------------------------------------------------------------------------------------------------------------------------------------------------------------------------------------------------------------|------------------------|----------------|
| 1            | Akre et al (1) 2016<br>Lausanne, Switzerland                    | N=42<br>Age:16-26<br>Female:19<br>Male: 23<br><br>E-cigarette user: 74%<br>Dual User: 31%                     | Participants recruited through social media, university sites and snowball methods<br>Topic guide developed from previous qualitative study on substance use and a literature search<br>8 Focus groups stratified by consumption type<br>Questions centred around: <ul style="list-style-type: none"> <li>• Consumption</li> <li>• Reasons to use or not to use e-cigarettes</li> <li>• Difference between e-cigarettes and traditional cigarettes</li> <li>• Thoughts on “gate-way effect”</li> </ul> | Thematic analysis (2)  | Good           |
| 2            | Antin et al (3) 2020<br>San Francisco, USA                      | N=49<br>Age:15-25<br><br>Female:24<br>Male: 25<br><br>38% White<br>62% Other<br>100%: Ever use of e-cigarette | Participants recruited through social media, on street recruitment methods and snowball methods<br>Semi-structured interviews<br>No mention how topic guide was developed<br>Topic guide centred around: <ul style="list-style-type: none"> <li>• Participant’s history of nicotine therapy (NT) use</li> <li>• Pathway into and current practices of vaping and smoking</li> <li>• Perceptions of vaping and smoking</li> </ul>                                                                       | Thematic analysis (4)  | Good           |
| 3            | Camenga et al (5) 2015<br>Public University and Public College, | N=127<br>Age: 13-22<br>Female:61<br>Male:66<br><br>56.7% non-Hispanic White                                   | Purposive sampling of smokers and non-smokers within colleges and high school groups<br>18 Focus groups stratified by gender and smoking status<br>Semi-structured qualitative guides developed from pilot focus group containing high school and college students<br>Questions centred around: <ul style="list-style-type: none"> <li>• Motivations to use e-cigarettes</li> </ul>                                                                                                                    | Framework analysis (6) | Good           |

|   |                                                                  |                                                                                                                                                                   |                                                                                                                                                                                                                                                                                                                                                                                                                                                                                     |                        |      |
|---|------------------------------------------------------------------|-------------------------------------------------------------------------------------------------------------------------------------------------------------------|-------------------------------------------------------------------------------------------------------------------------------------------------------------------------------------------------------------------------------------------------------------------------------------------------------------------------------------------------------------------------------------------------------------------------------------------------------------------------------------|------------------------|------|
|   | New Haven County, USA                                            | 20.5% non-Hispanic Black<br>10.2% Hispanic White,<br>3.9% Asian<br>8.7% other or multiple race/ethnicity<br><br>33.3%: Ever use of e-cigarettes                   | <ul style="list-style-type: none"> <li>Experiences with e-cigarettes</li> <li>Comparison between e-cigarettes and cigarettes</li> <li>Social norms around e-cigarette use</li> </ul> Recordings supplemented by field notes                                                                                                                                                                                                                                                         |                        |      |
| 4 | Case et al (7) 2016 Southwestern University, Texas, USA          | N=30<br>Age: 18-26<br>Females:16<br>Males:14<br><br>40% white non-Hispanic<br>17% Hispanic<br>30% Asian,<br>13% other races<br><br>50%: Current e-cigarette users | Purposive sampling of e-cigarette users and non -users from university participant pool and recruitment online through university wide event calendar<br>Semi structured interviews<br>Interview guide developed from the ‘Health Belief Model’ (8,9,10) and the ‘Theory of Planned Behaviour’ (11,12)<br>Topic guide centred around: knowledge, attitudes, perceived benefits/advantages, perceived barriers, perceived disadvantages, perceived norms and perceived self-efficacy | Thematic analysis (13) | Good |
| 5 | Chen et al (14) 2019 Washington D.C., Maryland and Virginia, USA | N=25<br>Age 18-34<br><br>Female: 10<br>Male:15<br><br>36% non-Hispanic black<br>28% non-Hispanic white<br>20% mixed race<br>8% white<br>8% other races            | Participants recruited from posting on Craigslist.com<br>Semi-structured interviews conducted over the phone<br>No mention how topic guide was developed<br>Topic guide centred around: <ul style="list-style-type: none"> <li>Young adult smokers’ attitudes and beliefs towards e-cigarette flavours</li> <li>Intentions of using e-cigarettes given an e-cigarette flavour ban</li> </ul>                                                                                        | Thematic analysis (15) | Good |

|   |                                      |                                                                                                                                                                                                                                                                        |                                                                                                                                                                                                                                                                                                                                                                                                                                                                                                                                                                                                                                                                                                                                                                                                                                                                                                                                             |                        |      |
|---|--------------------------------------|------------------------------------------------------------------------------------------------------------------------------------------------------------------------------------------------------------------------------------------------------------------------|---------------------------------------------------------------------------------------------------------------------------------------------------------------------------------------------------------------------------------------------------------------------------------------------------------------------------------------------------------------------------------------------------------------------------------------------------------------------------------------------------------------------------------------------------------------------------------------------------------------------------------------------------------------------------------------------------------------------------------------------------------------------------------------------------------------------------------------------------------------------------------------------------------------------------------------------|------------------------|------|
|   |                                      | 100%: Used e-cigarettes in the past 30 days                                                                                                                                                                                                                            |                                                                                                                                                                                                                                                                                                                                                                                                                                                                                                                                                                                                                                                                                                                                                                                                                                                                                                                                             |                        |      |
| 6 | Cheney et al (16) 2016 Oklahoma, USA | <p>N= 30<br/>Age: 18-30<br/>Females:16<br/>Male:14</p> <p>77% white<br/>17% African American<br/>3% Hispanic<br/>3% American Indian</p> <p>77%: daily e-cigarette use<br/>15%: use e-cigarette at least once a week<br/>10%: use e-cigarette at least once a month</p> | <p>Purposive sampling of e-cigarette users through posters within the local community and online advertising<br/>Semi-structured interviews<br/>Interview questions developed from a review of the literature, observations in vape stores and conversations with three straight-to-work young adults who were not included in the study<br/>Questions included were:</p> <ul style="list-style-type: none"> <li>• Tell me about the first time you used an e-cigarette</li> <li>• How much did you vape when you started</li> <li>• How much do you use now</li> <li>• If you run out of juice and the stores are closed, what do you do</li> <li>• How do your family and friends view vaping</li> <li>• Do people view you differently when they see you vaping rather than smoking</li> <li>• Looking back, how do you feel about your decision to start vaping</li> <li>• Do you see yourself quitting vaping at some point</li> </ul> | Thematic analysis (17) | Good |
| 7 | Cheney et al (18) 2018 Southwest USA | <p>N= 32<br/>Age:18-25</p> <p>Female: 10<br/>Male: 22</p> <p>75% white<br/>3% African-American<br/>13% Hispanic<br/>3% Asian<br/>6% American Indian</p>                                                                                                                | <p>Purposive sampling of participants through recruitment posters placed on university campuses and postings on website visited by students<br/>Semi-structured interviews<br/>Topic guide developed through reviewing literature and prior interviews with a small sample of college student e-cigarette users who were not included in the study<br/>Topic guide centred around:</p> <ul style="list-style-type: none"> <li>• Prior and current use of e-cigarettes and other tobacco products</li> <li>• How and when e-cigarettes are used</li> <li>• Beliefs about e-cigarettes</li> <li>• Specific influences on e-cigarette use</li> <li>• How family members and peers viewed their e-cigarette use</li> </ul>                                                                                                                                                                                                                      | Thematic analysis (19) | Good |

|   |                                                                                        |                                                                                                                                                                                                                                                                                         |                                                                                                                                                                                                                                                                                                                                                                                                                                                                                                                                                                  |                                  |      |
|---|----------------------------------------------------------------------------------------|-----------------------------------------------------------------------------------------------------------------------------------------------------------------------------------------------------------------------------------------------------------------------------------------|------------------------------------------------------------------------------------------------------------------------------------------------------------------------------------------------------------------------------------------------------------------------------------------------------------------------------------------------------------------------------------------------------------------------------------------------------------------------------------------------------------------------------------------------------------------|----------------------------------|------|
|   |                                                                                        | 100%: use e-cigarette once a week                                                                                                                                                                                                                                                       |                                                                                                                                                                                                                                                                                                                                                                                                                                                                                                                                                                  |                                  |      |
| 8 | Choi et al (20) 2012 Minneapolis, Minnesota, USA                                       | N=66<br>Age: 18-26<br>Female:40<br>Male: 26<br><br>56% American White<br>29% Asian<br>6% African American<br>1% Other                                                                                                                                                                   | Recruited through online adverts, flyers at two college campuses, a recruitment booth and an announcement in a student newsletter<br>11 focus groups stratified to gender and education<br>Discussion guide developed through a literature review and with experts in tobacco control policy, marketing, advertising and social media<br>Topic guide centred around: Perceptions of new tobacco products and experiences of these products.<br>Participants were also shown pictures of snus, dissolvable tobacco products and e-cigarettes                      | Thematic analysis (21)           | Good |
| 9 | Coleman et al (22) 2016 Washington, Orlando, Providence, Richmond and Los Angeles. USA | N=116<br>Age: 18-29 + 30><br>Female:57<br>Male:59<br><br>66% American White<br>15% Black or African American<br>11% Hispanic<br>7% Asian<br>1% American Indian<br>2% Other<br><br>47%: exclusively used e-cigarettes in the past 30 days<br>53%: used e-cigarettes as well as one other | Recruitment of participants through local market research firms<br>14 Focus groups<br>Moderator guide developed from the 'Theory of Planned Behaviour' (23)<br>Questions included: <ul style="list-style-type: none"> <li>• Why they used e-cigarette products</li> <li>• The benefits of using them</li> <li>• Similarities and differences between e-cigarettes and other tobacco products</li> <li>• Knowledge about ingredients</li> <li>• Beliefs about the harm of e-cigarettes</li> <li>• Their friends and families' opinions of e-cigarettes</li> </ul> | A phenomenological approach (24) | Good |

|    |                                                                                            |                                                                                                                                                                                                         |                                                                                                                                                                                                                                                                                                                                                                                                                                                                                                                                                                                                                                                                                  |                        |      |
|----|--------------------------------------------------------------------------------------------|---------------------------------------------------------------------------------------------------------------------------------------------------------------------------------------------------------|----------------------------------------------------------------------------------------------------------------------------------------------------------------------------------------------------------------------------------------------------------------------------------------------------------------------------------------------------------------------------------------------------------------------------------------------------------------------------------------------------------------------------------------------------------------------------------------------------------------------------------------------------------------------------------|------------------------|------|
|    |                                                                                            | tobacco product in the past 30 days                                                                                                                                                                     |                                                                                                                                                                                                                                                                                                                                                                                                                                                                                                                                                                                                                                                                                  |                        |      |
| 10 | Cooper et al (25)<br>2016<br>University of Texas Health Science Centre. Austin, Texas, USA | N= 59<br>Age: 21-23 + 37-41<br>Female:26<br>Male:24<br><br>56% American<br>White<br>6% African American<br>22% Asian<br>16% Other<br><br>72%: use e-cigarettes daily<br>28%: use e-cigarettes some days | Recruitment through a research opportunity post on the university online calendar<br>Interview guide developed through review of existing literature<br>Semi-structured interviews<br>Interview guide centred around: <ul style="list-style-type: none"> <li>• Motivations for use and perceptions of health impact</li> <li>• Subjective effects of nicotine delivery and dependence</li> <li>• Self-reported efficacy for smoking cessation or reduction</li> </ul>                                                                                                                                                                                                            | Thematic analysis (26) | Good |
| 11 | De Andrade et al (27)<br>2016<br>Fife, Scotland                                            | N=182<br>Ages 13-16                                                                                                                                                                                     | Recruited purposively by sex and smoking status<br>Health education and promotion programme produced a 'Pop-Up Radio Project' to explore whether pupils recalled key points from tobacco-education interventions<br>E-cigarettes were discussed by pupils<br>All pupils were interviewed by the primary investigator<br>Questions centred around: <ul style="list-style-type: none"> <li>• Whether they had taken part in any interventions</li> <li>• Gathering perceptions of interventions if applicable</li> <li>• Perceptions of smoking</li> <li>• Assessing views on smoking prevalence in young people</li> <li>• Exploring how interventions can be improved</li> </ul> | Thematic analysis (26) | Good |
| 12 | Dobbs et al (28)<br>2019<br>Arkansas USA                                                   | N=22<br>Age: 18+<br><br>Female:11<br>Male:11                                                                                                                                                            | Participants recruited through campus online newsletter<br>5 Focus groups<br>Topic guide developed from reviewing existing literature.<br>Topic guide centred around:                                                                                                                                                                                                                                                                                                                                                                                                                                                                                                            | Thematic analysis (26) | Good |

|    |                                      |                                                                                                                                                                              |                                                                                                                                                                                                                                                                                                                                                                                                                                                                                                                                            |                        |      |
|----|--------------------------------------|------------------------------------------------------------------------------------------------------------------------------------------------------------------------------|--------------------------------------------------------------------------------------------------------------------------------------------------------------------------------------------------------------------------------------------------------------------------------------------------------------------------------------------------------------------------------------------------------------------------------------------------------------------------------------------------------------------------------------------|------------------------|------|
|    |                                      | Demographic data not collected from participants<br><br>45%: trying/using e-cigarettes                                                                                       | <ul style="list-style-type: none"> <li>• The acceptability of college students using traditional cigarettes and e-cigarettes</li> <li>• Where individuals typically used e-cigarettes</li> <li>• Exploring social norms for cigarette and e-cigarette</li> <li>• Assessing participants knowledge and opinions of tobacco-free policies</li> </ul>                                                                                                                                                                                         |                        |      |
| 13 | Dono et al (29) 2019 South Australia | N=30<br>Age:18-25<br><br>Females:13<br>Male:17<br><br>33%: Never used e-cigarettes<br>47%: Experimental use of e-cigarettes<br>20%: Used e-cigarettes to quit smoking        | Participants recruited using a professional recruitment company<br>6 Focus groups<br>No mention how topic guide was developed<br>Visual stimuli used to facilitate discussions<br>Topic guide centred around: <ul style="list-style-type: none"> <li>• Experiences with smoking tobacco</li> <li>• Thoughts on smoking cessation</li> <li>• Knowledge and perceptions of e-cigarettes</li> <li>• Perceptions of messages portrayed in e-cigarette advertising</li> <li>• Perceptions of anti-e-cigarette messaging in the media</li> </ul> | Thematic analysis (30) | Good |
| 14 | Gowin et al (31) 2017 Oklahoma, USA  | N=30<br>Age:19-31<br><br>Females:14<br>Males:14<br><br>77%: White<br>17%: African American<br>3%: Hispanic<br>3%: American Indian<br><br>100%: Current users of e-cigarettes | Purposive sample of participants recruited through posters at various community locations<br>Semi structured interviews<br>Topic guided developed from review of current literature, author's research on e-cigarette store owners and conversations with a small sample of young adults who were not included in the study<br>Topic guide centred around: <ul style="list-style-type: none"> <li>• Knowledge, beliefs and rules regarding the health/safety of e-cigarette</li> <li>• Where they accessed their information</li> </ul>    | Grounded theory (32)   | Good |

|    |                                                                      |                                                                                                                                                                                                                                    |                                                                                                                                                                                                                                                                                                                                                                                                                                      |                        |      |
|----|----------------------------------------------------------------------|------------------------------------------------------------------------------------------------------------------------------------------------------------------------------------------------------------------------------------|--------------------------------------------------------------------------------------------------------------------------------------------------------------------------------------------------------------------------------------------------------------------------------------------------------------------------------------------------------------------------------------------------------------------------------------|------------------------|------|
| 15 | Hammal and Finegan (33)<br>2016<br>University of Alberta, Canada     | N= 45<br>Age: 12-17<br>Female:22<br>Male:23<br><br>33% European<br>13.3% Asian<br>4.4% Latin American<br>35.6% African American<br>13.3% Other<br><br>0%: used e-cigarettes in the past 30 days<br>54.9%: ever use of e-cigarettes | Convenience and quota sampling within schools to recruit participants along with snowball sampling<br>8 Focus groups with participants stratified by age<br>Topic guide developed from literature review<br>Questions centred around knowledge, initiation, use behaviour and family attitudes.                                                                                                                                      | Content analysis (32)  | Good |
| 16 | Hardcastle et al (34)<br>2014<br>Chester and Merseyside, England, UK | N=45<br>Age:13-17<br>Female: 15<br>Male: 30<br><br>91.1%: White British<br>8.99%: Other<br><br>42.2%: ever use of e-cigarettes                                                                                                     | Recruitment was facilitated by youth group leaders and teachers<br>7 Focus groups<br>Development of topic guide not discussed<br>Topic guide centred around young people's use of and attitudes towards e-cigarettes                                                                                                                                                                                                                 | Thematic analysis (26) | Good |
| 17 | Harrell et al (35)<br>2019<br>Southeastern USA                       | N= 49<br>Age: 18-29<br><br>Female:15<br>Male:34                                                                                                                                                                                    | Participants recruited through publicised adverts<br>4 focus groups and 2 individual interviews<br>Topic guide developed from reviewing current literature<br>Topic guide centred around: <ul style="list-style-type: none"> <li>• E-cigarette expectancies among young adults</li> <li>• Exploring beliefs regarding social effects of e-cigarettes</li> <li>• Perceptions about short/long term effects of e-cigarettes</li> </ul> | Content analysis (36)  | Good |

|           |                                                                               |                                                                                                                                                                                                                                                                  |                                                                                                                                                                                                                                                                                                                                                                                                                                                                                                                                                                                                                                                                             |                        |      |
|-----------|-------------------------------------------------------------------------------|------------------------------------------------------------------------------------------------------------------------------------------------------------------------------------------------------------------------------------------------------------------|-----------------------------------------------------------------------------------------------------------------------------------------------------------------------------------------------------------------------------------------------------------------------------------------------------------------------------------------------------------------------------------------------------------------------------------------------------------------------------------------------------------------------------------------------------------------------------------------------------------------------------------------------------------------------------|------------------------|------|
|           |                                                                               | <p>44.9% Non-Hispanic white<br/> 30.6% Non-Hispanic African American<br/> 8.2% Non-Hispanic Asian<br/> 4.1% Non-Hispanic multiracial<br/> 12.2% Hispanic</p> <p>Nonuser: 44.9%<br/> E-cigarette user: 24.5%<br/> Dual User: 16.3%<br/> Cigarette user: 14.3%</p> |                                                                                                                                                                                                                                                                                                                                                                                                                                                                                                                                                                                                                                                                             |                        |      |
| <b>18</b> | <p>Hess et al (37)<br/> 2017<br/> San Francisco Bay area, California, USA</p> | <p>N=46<br/> Age: 18-25<br/> Female:24<br/> Male:22</p> <p>100%: African American</p> <p>33%: ever use of e-cigarettes</p>                                                                                                                                       | <p>Recruited through social media and in local communities<br/> Further snowball sampling used<br/> Structured interviews<br/> The interview guide was developed from a literature search and exploratory focus groups conducted with black young adults<br/> Interview questions centred around:</p> <ul style="list-style-type: none"> <li>• Background of the participant</li> <li>• Racial identity</li> <li>• Personal tobacco and e-cigarette use</li> <li>• Smoking identity</li> <li>• Beliefs about tobacco</li> <li>• The social acceptability of tobacco</li> <li>• Perceptions and use of e-cigarettes</li> </ul> <p>Recordings supplemented by field notes</p> | Thematic analysis (26) | Good |
| <b>19</b> | <p>Hilton et al (38)<br/> 2016<br/> Scotland and</p>                          | <p>N=83<br/> Age: 14-17<br/> Female:39<br/> Male:44</p>                                                                                                                                                                                                          | <p>Recruited purposively by SES, gender, conventional cigarette use and e-cigarette use<br/> 16 focus groups<br/> Topic guide developed from a literature search and pilot work</p>                                                                                                                                                                                                                                                                                                                                                                                                                                                                                         | Thematic analysis (26) | Good |



|    |                                                                                          |                                                                                                                                         |                                                                                                                                                                                                                                                                                                                                                                                                                                                                                                                                                                                         |                        |      |
|----|------------------------------------------------------------------------------------------|-----------------------------------------------------------------------------------------------------------------------------------------|-----------------------------------------------------------------------------------------------------------------------------------------------------------------------------------------------------------------------------------------------------------------------------------------------------------------------------------------------------------------------------------------------------------------------------------------------------------------------------------------------------------------------------------------------------------------------------------------|------------------------|------|
|    | England.<br>UK                                                                           | 45%: ever use of e-cigarettes<br>11%: Current e-cigarette users                                                                         | The guide focused on 5 areas, which were knowledge and understanding about e-cigarettes, belief about the potential benefits and harms, experiences of e-cigarettes, knowledge and opinions on regulation<br>Discussions further facilitated by images of e-cigarettes and promotional material<br>Recordings supplemented by field notes                                                                                                                                                                                                                                               |                        |      |
| 20 | Johnson et al (39)<br>2017<br>Georgetown University Medical Centre, Washington , DC, USA | N=25<br>Age: 12-17<br>Female:14<br>Male:11<br><br>32%: African American<br>52%: White<br>16%: Other<br><br>8%: ever use of e-cigarettes | Purposive sampling of participants from an adolescent medicine clinic in an urban tertiary care hospital<br>Semi-structured interviews<br>Topic guide was developed from a literature review and consultation with study team<br>Questions centred around: <ul style="list-style-type: none"> <li>• Exposure to e-cigarettes</li> <li>• Recall of details of e-cigarette advertising locations</li> <li>• Perceived harm and addictiveness of e-cigarettes</li> <li>• Features of e-cigarettes and their advertising that may enhance or detract from their appeal to youths</li> </ul> | Thematic analysis (26) | Good |
| 21 | Keamy-Minor et al (40)<br>2019<br>California, USA                                        | N= 24<br>Age: 18-29<br><br>Female: 5<br>Male:19<br><br>Demographic data not recorded<br><br>100%: Current e-cigarette user              | Participants recruited through posts on Facebook and Instagram<br>Semi-structured interview<br>No mention how topic guide was developed<br>Topic guide centred around: <ul style="list-style-type: none"> <li>• How young adults perceive and use next generation pod device</li> <li>• If their use of pod devices differs from non-pod e-cigarettes and traditional cigarettes</li> </ul>                                                                                                                                                                                             | Thematic analysis (41) | Good |
| 22 | Lucherini et al (42)<br>2018<br>Scotland, UK                                             | N= 72<br>Age:16-24<br><br>Female: 39<br>Male: 33<br><br>Demographic data not recorded                                                   | Participants recruited through community organisation, educational institutions, postings on skills exchange website Gumtree and snowball methods.<br>22 focus groups and 11 individual semi-structured interviews<br>No mention how topic guide was developed<br>Topic guide centred around: <ul style="list-style-type: none"> <li>• Smoking/vaping history</li> <li>• Where, when and how participants had encountered e-cigarettes</li> </ul>                                                                                                                                       | Thematic analysis (26) | Good |

|    |                                                                                  |                                                                                                                             |                                                                                                                                                                                                                                                                                                                                                                                                                                                                                                                                                                                                                                                                        |                        |      |
|----|----------------------------------------------------------------------------------|-----------------------------------------------------------------------------------------------------------------------------|------------------------------------------------------------------------------------------------------------------------------------------------------------------------------------------------------------------------------------------------------------------------------------------------------------------------------------------------------------------------------------------------------------------------------------------------------------------------------------------------------------------------------------------------------------------------------------------------------------------------------------------------------------------------|------------------------|------|
|    |                                                                                  | 83%: Ever use of e-cigarettes                                                                                               | Different e-cigarette types were brought as props to generate discussions<br>Visual example of e-cigarettes being used and e-cigarette advertising were provided during the interview                                                                                                                                                                                                                                                                                                                                                                                                                                                                                  |                        |      |
| 23 | Lucherini et al (43)<br>2019<br>Scotland, UK                                     | N= 72<br>Age:16-24<br><br>Female: 39<br>Male: 33<br><br>Demographic data not recorded<br><br>83%: Ever use of e-cigarettes] | Purposive sample of participants recruited through community organisation, educational institutions, postings on skills exchange website Gumtree and snowball methods.<br>22 focus groups and 11 individual semi-structured interviews<br>No mention how topic guide was developed<br>Topic guide centred around: <ul style="list-style-type: none"> <li>Experiences of smoking and vaping</li> <li>Participants experiences of e-cigarette marketing and advertising</li> </ul> Different e-cigarette types were brought as props to generate discussions<br>Visual example of e-cigarettes being used and e-cigarette advertising were provided during the interview | Thematic analysis (26) | Good |
| 24 | Maglalang et al (44)<br>2019<br>California, USA                                  | N= 12<br>Age: 19-34<br><br>Female: 4<br>Male: 8<br><br>100%: Asian American<br><br>100%: Current e-cigarette users          | Participants recruited through social media, electronic newsletters and snowball sampling<br>Semi-structured interviews<br>Topic guide developed from review of existing literature<br>Topic guide centred around: <ul style="list-style-type: none"> <li>Their identity</li> <li>Use of Electronic cigarettes</li> <li>Health perceptions of electronic cigarettes</li> </ul> How Asian culture influences behaviour and attitudes towards Electronic Cigarettes                                                                                                                                                                                                      | Thematic analysis (26) | Good |
| 25 | McDonald EA and Ling PM (45)<br>2015<br>Manhattan, Brooklyn and Queens. NYC, USA | N=87<br>Age: 18-27<br>Female:44<br>Male:56<br><br>52%: Non-Hispanic white<br>9%: African American                           | Recruitment of participants from bars<br>12 Semi-structured interviews<br>16 Focus group stratified to either daily smokers or non-smokers who had used e-cigarettes<br>No mention on how topic guide was developed<br>Topic guide centred around: <ul style="list-style-type: none"> <li>Definitions of smoking and smokers</li> <li>Experiences with tobacco and e-cigarettes</li> <li>Perceived benefits and risks</li> <li>Experiences with stopping tobacco use</li> </ul>                                                                                                                                                                                        | Thematic analysis (26) | Good |

|    |                                                                         |                                                                                                           |                                                                                                                                                                                                                                                                                                                                                                                                                                                                                                                                                           |                                                   |      |
|----|-------------------------------------------------------------------------|-----------------------------------------------------------------------------------------------------------|-----------------------------------------------------------------------------------------------------------------------------------------------------------------------------------------------------------------------------------------------------------------------------------------------------------------------------------------------------------------------------------------------------------------------------------------------------------------------------------------------------------------------------------------------------------|---------------------------------------------------|------|
|    |                                                                         | <p>3%: Pacific Islander<br/>23%: Hispanic<br/>13%: Other races</p> <p>32%: current e-cigarettes users</p> | Recording supplemented with video-taping of focus groups                                                                                                                                                                                                                                                                                                                                                                                                                                                                                                  |                                                   |      |
| 26 | <p>McKeganey et al (46)<br/>2018<br/>North of England, Scotland, UK</p> | <p>N=8<br/>Age: 16-30</p> <p>Female:2<br/>Male: 6</p> <p>Demographic data not recorded</p>                | <p>Participants recruited from larger e-cigarette study<br/>Two semi-structured interviews occurred 6 months apart<br/>No mention how topic guide was developed<br/>Topic guide centred around:</p> <ul style="list-style-type: none"> <li>• Perceptions and use of e-cigarette</li> <li>• Circumstances of their use</li> <li>• How their use is perceived by others</li> <li>• The frequency of their use of e-cigarettes</li> <li>• The likelihood of participants using e-cigarettes in the future</li> </ul>                                         | <p>Content analysis<br/>No reference included</p> | Fair |
| 27 | <p>McKeganey et al (47)<br/>2018<br/>North of England, Scotland, UK</p> | <p>N=50<br/>Age:16-26</p> <p>Females:18<br/>Male:32</p> <p>100%: E-cigarette users</p>                    | <p>Participants recruited from universities/colleges, leisure and work settings and snowball sampling.<br/>No mention how topic guide was developed<br/>Topic guide centred around:</p> <ul style="list-style-type: none"> <li>• Reasons for initiating e-cigarette use</li> <li>• Views on the relative harm of smoking and vaping</li> <li>• Views on how similar or dissimilar the activities of vaping and smoking are</li> <li>• Whether in their view their likelihood of smoking had increased or decreased as a result of their vaping</li> </ul> | <p>Content analysis<br/>No reference included</p> | Good |
| 28 | <p>Peters et al (48)<br/>2013<br/>University of Houston, Texas, USA</p> | <p>N= 47<br/>Age: 15-17<br/>Male: 47</p> <p>74%: African American<br/>26%: Hispanic American</p>          | <p>Purposive sampling of male participants by school staff<br/>No mention on how topic guide was developed<br/>Focus groups stratified by age<br/>Questions asked:</p> <ul style="list-style-type: none"> <li>• Why do youth use electronic cigarettes</li> <li>• Where are places that you use electronic cigarettes</li> <li>• What do your friends think about electronic cigarettes</li> <li>• Why are electronic cigarettes so popular</li> </ul>                                                                                                    | <p>Thematic analysis (26)</p>                     | Fair |

|           |                                                                         |                                                                                                                                                                                                                                           |                                                                                                                                                                                                                                                                                                                                                                                                                                                                                                                                                                                                                                                                                                                                                                                                                                    |                       |      |
|-----------|-------------------------------------------------------------------------|-------------------------------------------------------------------------------------------------------------------------------------------------------------------------------------------------------------------------------------------|------------------------------------------------------------------------------------------------------------------------------------------------------------------------------------------------------------------------------------------------------------------------------------------------------------------------------------------------------------------------------------------------------------------------------------------------------------------------------------------------------------------------------------------------------------------------------------------------------------------------------------------------------------------------------------------------------------------------------------------------------------------------------------------------------------------------------------|-----------------------|------|
|           |                                                                         | 100%: current e-cigarette users                                                                                                                                                                                                           | Recordings supplemented by field notes                                                                                                                                                                                                                                                                                                                                                                                                                                                                                                                                                                                                                                                                                                                                                                                             |                       |      |
| <b>29</b> | Pokhrel et al (49) 2015 University of Hawaii Cancer Centre, Hawaii, USA | N=62<br>Age: 18-35<br>Female:39<br>Male:23<br><br>19%: Asian American<br>8%: African American<br>12%: Filipino<br>7%: Hispanic/Latino<br>23%: Native Hawaiian/other Pacific Islander<br>31%: White<br><br>100%: current e-cigarette users | Recruitment through adverts and flyers at colleges<br>12 mix-gender focus groups<br>Topic guide development not mentioned<br>Three sets of questions asked across all focus groups<br>The responses to one set of questions is discussed in this paper <ul style="list-style-type: none"> <li>• If you currently smoke cigarettes when do you smoke cigarettes and when do you use e-cigarette</li> <li>• [For those who had quit both] At the time when you were using both cigarettes and e-cigarettes, when did you use cigarettes and when did you use e-cigarettes</li> </ul> Recording supplemented by field notes                                                                                                                                                                                                           | Content analysis (50) | Good |
| <b>30</b> | Pokhrel et al (51) 2015 University of Hawaii Cancer Centre, Hawaii, USA | N= 62<br>Age: 18-35<br>Female:23<br>Male:39<br><br>19%: Asian American<br>8%: African American<br>12%: Filipino<br>7%: Hispanic/Latino<br>23%: Native Hawaiian/other Pacific Islander<br>31%: White                                       | Recruitment through adverts and flyers at colleges<br>12 mix-gender focus groups<br>Topic guide development not mentioned<br>Three sets of questions were asked across the focus groups<br>The responses to two sets are discussed in this paper <ul style="list-style-type: none"> <li>• What do you like about e-cigarettes</li> <li>• Why do you use e-cigarettes</li> <li>• What are the positive consequences that you expect out of using e-cigarettes</li> <li>• What do you not like about e-cigarettes</li> <li>• What are the negative consequences that you expect out of using e-cigarette</li> <li>• What are the reasons that may make you stop using e-cigarettes</li> <li>• Questions on dual use were asked but not provided as it is not relevant to this study</li> </ul> Recording supplemented by field notes | Content analysis (50) | Good |

|    |                                                                                    |                                                                                                                                                                                             |                                                                                                                                                                                                                                                                                                                                                                                                                                                                                                                                                                                                                                                                                                                   |                        |      |
|----|------------------------------------------------------------------------------------|---------------------------------------------------------------------------------------------------------------------------------------------------------------------------------------------|-------------------------------------------------------------------------------------------------------------------------------------------------------------------------------------------------------------------------------------------------------------------------------------------------------------------------------------------------------------------------------------------------------------------------------------------------------------------------------------------------------------------------------------------------------------------------------------------------------------------------------------------------------------------------------------------------------------------|------------------------|------|
|    |                                                                                    | 100%: current e-cigarette users                                                                                                                                                             |                                                                                                                                                                                                                                                                                                                                                                                                                                                                                                                                                                                                                                                                                                                   |                        |      |
| 31 | Roditis et al (52)<br>2015<br>Stanford University, California, USA                 | N=24<br>Age: 15-19<br>Female: 9<br>Male:15<br><br>25%: White<br>33.3% Black/African American<br>16.7%: Asian<br>4.2%: American Indian/Alaskan native<br><br>16.7%: ever use of e-cigarettes | Participants were purposefully selected from afterschool programmes in urban Northern California school district<br>6 Focus groups<br>Topic guide development not mentioned<br>Semi-structured guide used to assess perceptions of the risk and benefits related to using conventional cigarettes, e-cigarettes and marijuana: <ul style="list-style-type: none"> <li>• Where, what and from whom they had learned about these products</li> <li>• Asked to discuss why they would use one product over another product</li> </ul>                                                                                                                                                                                | Thematic analysis (26) | Good |
| 32 | Wagoner et al (53)<br>2016<br>Raleigh, Durham and Chapel Hill. North Carolina, USA | N=77<br>Age: 13-25<br>Female:43<br>Male:34<br><br>57%: White<br>26%: Black<br>4%: Asian<br>13%: Other<br><br>28.6%: past 30-day e-cigarette use<br>14.3%: ever use of e-cigarettes          | Recruitment through adverts on social media, newspapers, and media outlets<br>Further in-person recruitment in community settings<br>10 Focus groups stratified by age and use of e-cigarettes<br>Topic guide developed from a literature review, pilot work and input from the study team<br>Topic guide centred around familiarity, knowledge and health effects<br>New questions added to focus groups 7-10 <ul style="list-style-type: none"> <li>• Have you heard of e-hookahs or hookah pens</li> <li>• What do you know about them</li> <li>• Are they different from e-cigarettes</li> <li>• Do you know people who use them</li> <li>• Are there other devices like this we should know about</li> </ul> | Thematic analysis (26) | Good |
| 33 | Weishar et al (54)<br>2016                                                         | N=83<br>Age: 14-17<br>Female:39<br>Male:44                                                                                                                                                  | Recruited purposively by age, SES, smoking status and e-cigarette use<br>16 Focus groups<br>Topic guide developed from a literature search and pilot work                                                                                                                                                                                                                                                                                                                                                                                                                                                                                                                                                         | Thematic analysis (26) | Good |

|    |                                              |                                                                                 |                                                                                                                                                                                                                                                                                                                                                                                                                                                       |                      |      |
|----|----------------------------------------------|---------------------------------------------------------------------------------|-------------------------------------------------------------------------------------------------------------------------------------------------------------------------------------------------------------------------------------------------------------------------------------------------------------------------------------------------------------------------------------------------------------------------------------------------------|----------------------|------|
|    | Scotland and England. UK                     | 57%: ever use of e-cigarettes                                                   | The guide focused on five areas, which were, knowledge and understanding about e-cigarettes; belief about the potential benefits and harms; experiences of e-cigarettes; knowledge and opinions on regulation<br>Discussions further facilitated by images of e-cigarettes and promotional material<br>Recordings supplemented by field notes                                                                                                         |                      |      |
| 34 | Yule and Tinson (55) 2017 Massachusetts, USA | N=20<br>Age: 21-27<br>Female:12<br>Male:8<br><br>45%: current e-cigarette users | Purposive sampling of participants in ‘emerging adulthood’ who engage with vaping behaviour<br>Semi-structured interviews<br>Topic guide/question development process not mentioned<br>Questions centred around: <ul style="list-style-type: none"> <li>• Experiences and perspectives of e-cigarettes</li> <li>• Sociability of vaping</li> <li>• Knowledge of vaping</li> <li>• Thoughts on restrictions and regulations on e-cigarettes</li> </ul> | Grounded theory (56) | Good |

1. Akre C, Suris JC. Adolescents and young adults’ perceptions of electronic cigarettes as a gateway to smoking: a qualitative study in Switzerland. *Health Educ Res.* 2017;32(5):448–54. <https://doi.org/10.1093/her/cyx054>
2. Collingridge DS, Gantt EE. The quality of qualitative research. *Am J Med Qual.* 2008;23(5):389–95. <https://doi.org/10.1177/1062860608320646>.
3. Antin T, Hess C, Kaner E, Lipperman-Kreda S, Annechino R, Hunt G. Pathways of nicotine product use: a qualitative study of youth and young adults in California. *Nicotine Tob Res.* 2020;22(5):722–7. <https://doi.org/10.1093/ntr/ntz028>.
4. Bernard HR. *Analyzing qualitative data: systematic approaches.* Los Angeles; London: SAGE; 2010.
5. Camenga DR, Cavallo DA, Kong G, Morean ME, Connell CM, Simon P, et al. Adolescents’ and young adults’ perceptions of electronic cigarettes for smoking cessation: a focus group study. *Nicotine Tob Res.* 2015;17(10): 1235–41. <https://doi.org/10.1093/ntr/ntv020>.
6. Ritchie J, Lewis J. *Qualitative research practice: a guide for social science students and researchers.* London: SAGE Publications; 2003.
7. Case K, Crook B, Lazard A, Mackert M. Formative research to identify perceptions of e-cigarettes in college students: implications for future health communication campaigns. *J Am Coll Heal.* 2016;64(5):380–9. <https://doi.org/10.1080/07448481.2016.1158180>.
8. Rosenstock IM. What research in motivation suggests for public health. *Am J Public Health Nations Health.* 1960;50(3\_Pt\_1):295–302. [https://doi.org/10.2105/AJPH.50.3\\_Pt\\_1.295](https://doi.org/10.2105/AJPH.50.3_Pt_1.295)
9. Rosenstock IM. The health belief model and preventive health behavior. *Health Educ Behav.* 1974;2(4):354–86. <https://doi.org/10.1177/109019817400200405>.

10. Champion VL, Skinner CS. The health belief model. 4th ed. San Francisco: Jossey-Bass; 2008
11. Ajzen I, M F. Understanding attitudes and predicting social behaviour. N. J, USA: Prentice-Hall; 1980
12. Fishbein MA, Ajzen I. Belief, attitude, intention and behaviour: an introduction to theory and research. MA, USA: Addison-Wesley; 1975
13. Miles MB, Huberman MA, Saldana J. Qualitative data analysis: a methods sourcebook. 3rd ed. Thousand Oaks: SAGE Publications; 2013.
14. Chen JLC, Green K, Fryer C, Borzekowski D. Perceptions about e-cigarette flavors: a qualitative investigation of young adult cigarette smokers who use e-cigarettes. *Addict Res Theory*. 2019;27(5):420–8. <https://doi.org/10.1080/16066359.2018.1540693>.
15. Rice PL. Qualitative research methods: a health focus. Victoria: Oxford University Press; 1999.
16. Cheney MK, Gowin M, Wann TF. Electronic cigarette use in straight-to-work young adults. *Am J Health Behav*. 2016;40(2):268–79. <https://doi.org/10.5993/AJHB.40.2.12>
17. Miles MB, Huberman MA, Saldana J. Qualitative data analysis: a methods sourcebook. 3rd ed. Thousand Oaks: SAGE Publications; 2013
18. Cheney MK, Gowin M, Clawson AH. Using the ecological model to understand influences on college student vaping. *J Am Coll Heal*. 2018; 66(7):597–607. <https://doi.org/10.1080/07448481.2018.1440578>.
19. Tolley EE, Ulin PR, Mack N, Robinson ET, Succop SM. Qualitative methods in public health: a field guide for applied research. 2nd ed. Hoboken: Wiley; 2016.
20. Choi K, Fabian L, Mottey N, Corbett A, Forster J. Young adults' favorable perceptions of snus, dissolvable tobacco products, and electronic cigarettes: findings from a focus group study. *Am J Public Health*. 2012;102(11):2088–93. <https://doi.org/10.2105/AJPH.2011.300525>
21. Boyatzis RE. Transforming qualitative information: thematic analysis and code development. Thousand Oaks: SAGE Publications; 1998.
22. Coleman BN, Johnson SE, Tessman GK, Tworek C, Alexander J, Dickinson DM, et al. “It’s not smoke. It's not tar. It’s not 4000 chemicals. Case closed”: Exploring attitudes, beliefs, and perceived social norms of e-cigarette use among adult users. *Drug Alcohol Depend*. 2016;159:80–5.
23. Icek A. The theory of planned behaviour. *Organ Behav Hum Decis Process*. 1991;50(2):179–221. [https://doi.org/10.1016/0749-5978\(91\)90020-T](https://doi.org/10.1016/0749-5978(91)90020-T).
24. Giorgi A. The theory, practice, and evaluation of the phenomenological method as a qualitative research procedure. *J Phenomenol Psychol*. 1997; 28(2):235–60. <https://doi.org/10.1163/156916297X00103>.
25. Cooper M, Harrell MB, Perry CL. Comparing young adults to older adults in e-cigarette perceptions and motivations for use: implications for health communication. *Health Educ Res*. 2016;31(4):429–38. <https://doi.org/10.1093/her/cyw030>.
26. Braun V, Clarke V. Using thematic analysis in psychology. *Qual Res Psychol*. 2006;3(2):77–101. <https://doi.org/10.1191/1478088706qp063oa>

27. de Andrade M, Angus K, Hastings G. Teenage perceptions of electronic cigarettes in Scottish tobacco-education school interventions: co-production and innovative engagement through a pop-up radio project. *Perspect Public Health*. 2016;136(5):288–93. <https://doi.org/10.1177/1757913915612109>.
28. Dobbs PD, Rolfe DT, Cheney MK. Cigarettes vs. E-cigarettes: policy implications from a focus group study. *Subst Use Misuse*. 2019;54(12):2082–7. <https://doi.org/10.1080/10826084.2019.1626436>
29. Dono J, Wilson C, Ettridge K, Miller C. ‘I don’t think I’d feel good about myself if I was to give up smoking and go to one of these’: perceptions of e-cigarettes among south Australian young adult smokers and ex-smokers. *Addict Res Theory*. 2019;27(3):258–68. <https://doi.org/10.1080/16066359.2018.1501032>.
30. Braun V, Clarke V. *Successful qualitative research : a practical guide for beginners*. London: Los Angeles: SAGE; 2013
31. Gowin M, Cheney MK, Wann TF. Knowledge and beliefs about e-cigarettes in straight-to-work young adults. *Nicotine Tob Res*. 2017;19(2):208–14. <https://doi.org/10.1093/ntr/ntw195>
32. Patton MQ. *Qualitative research and evaluation methods*. 3rd ed. Thousand Oaks: Sage Publications; 2002.
33. Hammal F, Finegan B. Exploring attitudes of children 12-17 years of age toward electronic cigarettes. *J Community Health*. 2016;41(5):962–8. <https://doi.org/10.1007/s10900-016-0178-6>.
34. Hardcastle K, Hughes K, Worsley J, Bennett A, Ireland R, Sweeney S. “Most people I know have got one” - young people’s perceptions and experiences of electronic cigarettes summary report. Liverpool: Health Equalities Group; 2014
35. Harrell PT, Brandon TH, England KJ, Barnett TE, Brockenberry LO, Simmons VN, et al. Vaping expectancies: a qualitative study among young adult nonusers, smokers, vapers, and dual users. *Subst Abuse Res Treat*. 2019;13: 1178221819866210.
36. Bridges S, Jin J. Qualitative research in PBL in health sciences education: a review. *Interdiscip J Probl Based Learn*. 2016;10(2). <https://doi.org/10.7771/1541-5015.1605>
37. Hess CA, Antin TMJ, Annechino R, Hunt G. Perceptions of E-cigarettes among black youth in California. *Int J Environ Res Public Health*. 2017;14(1): 60. <https://doi.org/10.3390/ijerph14010060>.
38. Hilton S, Weishaar H, Sweeting H, Trevisan F, Katikireddi SV. E-cigarettes, a safer alternative for teenagers? A UK focus group study of teenagers’ views. *BMJ Open*. 2016;6(11):e013271. <https://doi.org/10.1136/bmjopen-2016-013271>.
39. Johnson AC, Mays D, Hawkins KB, Denzel M, Tercyak KP. A qualitative study of adolescent perceptions of electronic cigarettes and their marketing: implications for prevention and policy. *Childrens Health Care*. 2017;46(4): 379–92. <https://doi.org/10.1080/02739615.2016.1227937>.
40. Keamy-Minor E, McQuoid J, Ling PM. Young adult perceptions of JUUL and other pod electronic cigarette devices in California: a qualitative study. *BMJ Open*. 2019;9(4):e026306. <https://doi.org/10.1136/bmjopen-2018-026306>
41. McQuoid J, Keamy-Minor E, Ling PM. A practice theory approach to understanding poly-tobacco use in the United States. *Crit Public Health*. 2020;30(2):204–19. <https://doi.org/10.1080/09581596.2018.1541226>
42. Lucherini M, Rooke C, Amos A. E-cigarettes, vaping and performativity in the context of tobacco denormalisation. *Social Health Illn*. 2018;40(6):1037–52. <https://doi.org/10.1111/1467-9566.12741>.



43. Lucherini M, Rooke C, Amos A. "They're thinking, well it's not as bad, I probably won't get addicted to that. But it's still got the nicotine in it, so...": maturity, control, and socializing: negotiating identities in relation to smoking and vaping - a qualitative study of young adults in Scotland. *Nicotine Tob Res.* 2019;21(1):81–7. <https://doi.org/10.1093/ntr/ntx245>
44. Maglalang DD, Le MN, Yoo GJ, Del Mundo GO. Personal motivations of Asian Americans who use ENDS: a qualitative study. *Am J Health Behav.* 2019;43(4):680–90. <https://doi.org/10.5993/AJHB.43.4.3>
45. McDonald EA, Ling PM. One of several 'toys' for smoking: young adult experiences with electronic cigarettes in New York City. *Tob Control.* 2015; 24(6):588–93. <https://doi.org/10.1136/tobaccocontrol-2014-051743>.
46. McKeganey N, Barnard M. Change and continuity in vaping and smoking by young people: a qualitative case study of a friendship group. *Int J Environ Res Public Health.* 2018;15(5):1008. <https://doi.org/10.3390/ijerph15051008>.
47. McKeganey N, Barnard M, Russell C. Vapers and vaping: E-cigarettes users views of vaping and smoking. *Drugs. Educ Prev Policy.* 2018;25(1):13–20. <https://doi.org/10.1080/09687637.2017.1296933>.
48. Peters RJ Jr, Meshack A, Lin MT, Hill M, Abughosh S. The social norms and beliefs of teenage male electronic cigarette use. *J Ethn Subst Abus.* 2013; 12(4):300–7. <https://doi.org/10.1080/15332640.2013.819310>.
49. Pokhrel P, Herzog TA, Muranaka N, Regmi S, Fagan P. Contexts of cigarette and e-cigarette use among dual users: a qualitative study. *BMC Public Health.* 2015;15(1):859. <https://doi.org/10.1186/s12889-015-2198-z>
50. Elo S, Kyngas H. The qualitative content analysis process. *J Adv Nurs.* 2008; 62(1):107–15. <https://doi.org/10.1111/j.1365-2648.2007.04569.x>.
51. Pokhrel P, Herzog TA, Muranaka N, Fagan P. Young adult e-cigarette users' reasons for liking and not liking e-cigarettes: a qualitative study. *Psychol Health.* 2015;30(12):1450–69. <https://doi.org/10.1080/08870446.2015.1061129>.
52. Roditis ML, Halpern-Felsher B. Adolescents' perceptions of risks and benefits of conventional cigarettes, E-cigarettes, and marijuana: a qualitative analysis. *J Adolesc Health.* 2015;57(2):179–85. <https://doi.org/10.1016/j.jadohealth.2015.04.002>.
53. Wagoner KG, Cornacchione J, Wiseman KD, Teal R, Moracco KE, Sutfin EL. E-cigarettes, hookah pens and vapes: adolescent and young adult perceptions of electronic nicotine delivery systems. *Nicotine Tob Res.* 2016; 18(10):2006–12. <https://doi.org/10.1093/ntr/ntw095>
54. Weishaar H, Trevisan F, Hilton S. Maybe they should regulate them quite strictly until they know the true dangers': a focus group study exploring UK adolescents' views on e-cigarette regulation. *Addiction.* 2016;111(9):1637–45. <https://doi.org/10.1111/add.13377>.
55. Yule JA, Tinson JS. Youth and the sociability of "vaping". *J Consum Behav.* 2017;16(1):3–14. <https://doi.org/10.1002/cb.1597>
56. Juliet C, Anselm S. Basics of qualitative research: grounded theory. Newbury Park: SAGE Publishing House; 1990.
